# Supplementary material for: Mg-chelatase H subunit affects ABA signaling in stomatal guard cells, but is not an ABA receptor in Arabidopsis thaliana
Source: PubMed Central journal article supplement — J Plant Res. 2011 May 12;124(4):527–38. doi: 10.1007/s10265-011-0426-x (PMC3129500; doi:10.1007/s10265-011-0426-x), 2011-05-12
Supplement: 10265_2011_426_MOESM1_ESM.pdf [file 10265_2011_426_MOESM1_ESM.pdf]

# Supplemental Figure 1

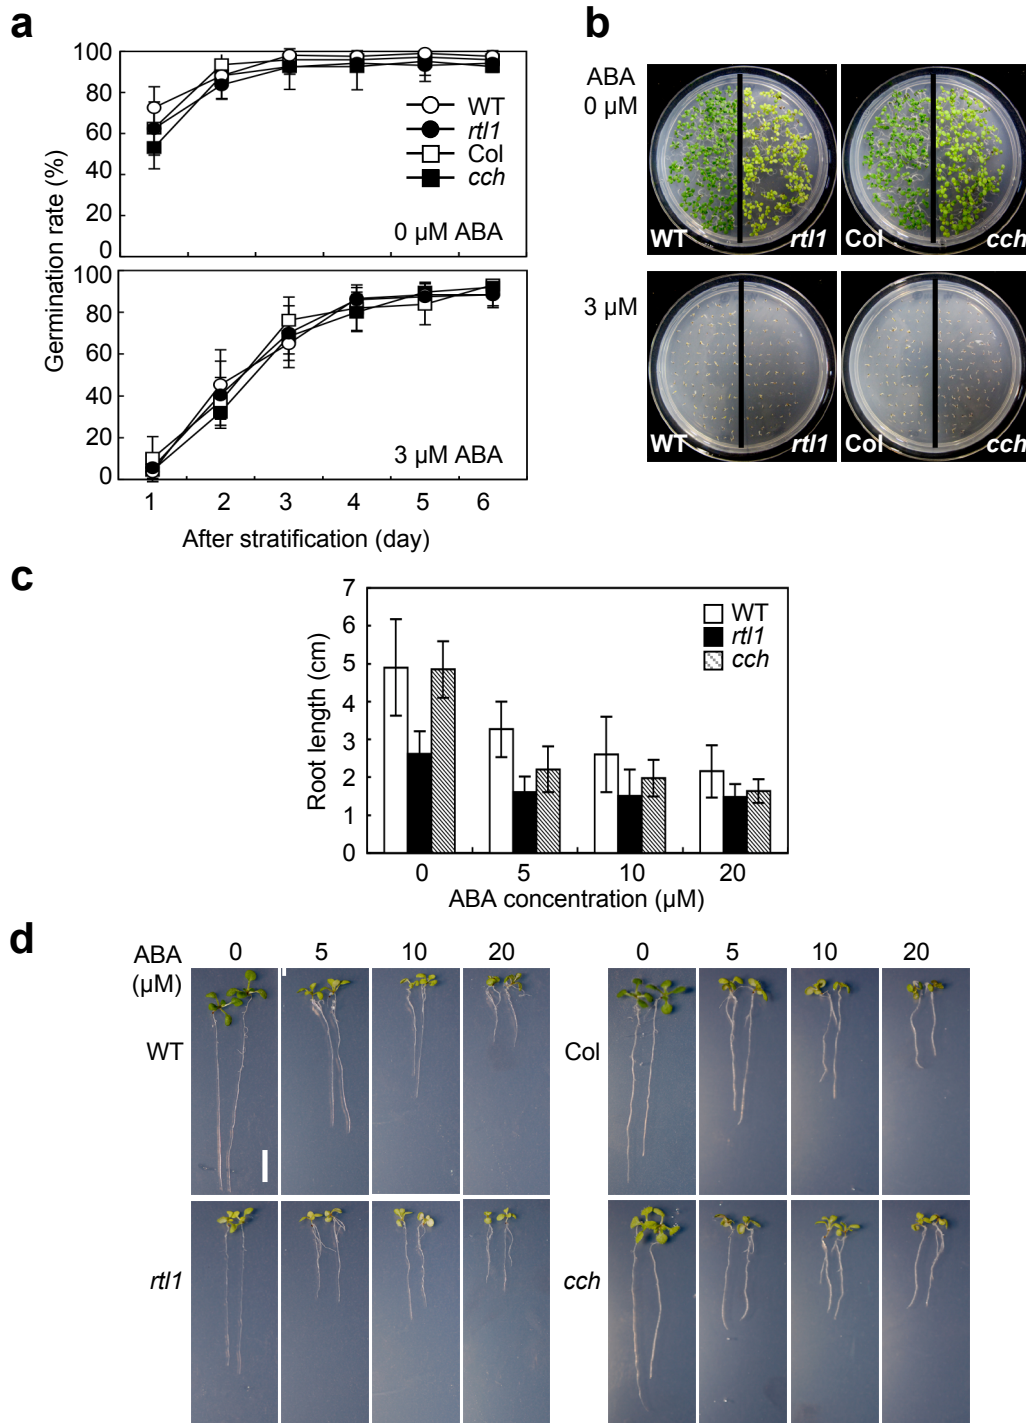

**Supplemental Fig. 1** Sensitivities of *rtl1* seed germination and root growth to ABA. **a** Effect of ABA on seed germination of wild-type (WT) (*open circles*), *rtl1* (*closed circles*), Col (*open squares*), and *cch* (*closed squares*). Seeds were plated on MS medium supplemented with the indicated concentration of ABA and incubated at 24°C under light. Col is the genetic background plant of *cch*. Data represent the mean of approximately 100 measurements with SD. **b** Ten-day-old WT, *rtl1*, Col, and *cch* plants grown on MS medium with or without 3 μM ABA. **c** Effect of ABA on the root growth of WT (*white*), *rtl1* (*black*), and *cch* (*shaded*) plants. Seeds were plated on MS medium for 60 h and then transferred to medium supplemented with the indicated concentration of ABA. Root length was measured after 7 days. Data represent the mean of approximately 25 measurements with SD. **d** Photographs of representative WT, *rtl1*, Col, and *cch* seedlings at 7 days after transferring to the medium containing ABA. *Bar* 10 mm All experiments repeated three times using different batches of seeds gave similar results.
