# Supplementary material for: Mg-chelatase H subunit affects ABA signaling in stomatal guard cells, but is not an ABA receptor in Arabidopsis thaliana
Source: PubMed Central journal article supplement — J Plant Res. 2011 May 12;124(4):527–38. doi: 10.1007/s10265-011-0426-x (PMC3129500; doi:10.1007/s10265-011-0426-x), 2011-05-12
Supplement: 10265_2011_426_MOESM2_ESM.pdf [file 10265_2011_426_MOESM2_ESM.pdf]

## Supplemental Figure 2

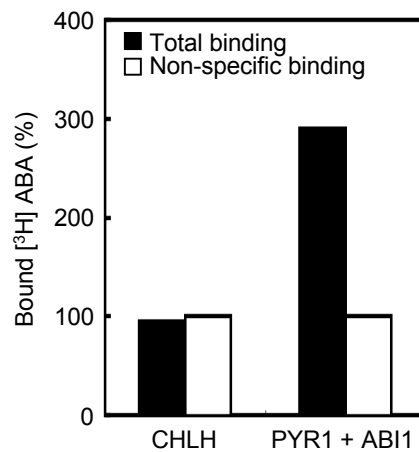

**Supplemental Fig. 2** ABA-binding assay of the recombinant CHLH protein by the pull-down method. GST-CHLH or GST-PYR1 bound to glutathione sepharose 4B beads, were incubated with 50 nM  $^3\text{H}$ -labeled ABA in the absence (*black*) or presence of 1,000-fold unlabeled ABA (*white*) for 1 h at 25°C. For GST-PYR1, recombinant His-ABI1 was added to the reaction mixture. The total  $^3\text{H}$ -labeled ABA binding (*black*) of GST-CHLH or GST-PYR1 was indicated as the percentage of the non-specific ABA binding of each GST-fused protein (*white*). Experiments repeated twice on different occasions gave similar results.
